# Supplementary material for: Influence of weather and atmospheric pollution on physical activity in patients with COPD
Source: PubMed Central journal article supplement (PMC4470337; doi:10.1186/s12931-015-0229-z), 2015-06-13

# **Influence of weather and atmospheric pollution on physical activity in patients with COPD.**

**Ayedh D Alahmari<sup>1</sup>, Alex J Mackay<sup>1</sup>, Anant RC Patel<sup>1</sup>, Beverly S Kowlessar<sup>2</sup>, Richa Singh<sup>2</sup>,  
Simon E Brill<sup>2</sup>, James P Allinson<sup>2</sup>, Jadwiga A Wedzicha<sup>2</sup>, Gavin C Donaldson<sup>2</sup>**

**Online Data Supplement**

Table S1. Relationship between pollutants ( $PM_{10}$  and  $O_3$ ) and Daily steps count, hours spent outdoors, health status (CAT score), PEFR, dyspnoea, **over weekdays (Monday-Friday)**; with allowance for season, linear trend, day-length, temperature, sunshine, rain and wind.

|                       | Effect of $1 \mu\text{g}/\text{m}^3$ $PM_{10}$ (Weekdays) |                                                  |         | Effect of $1 \mu\text{g}/\text{m}^3$ $O_3$ (weekdays) |                                                    |         |
|-----------------------|-----------------------------------------------------------|--------------------------------------------------|---------|-------------------------------------------------------|----------------------------------------------------|---------|
|                       | Regression Coefficient                                    | 95% CI                                           | p-value | Regression Coefficient                                | 95% CI                                             | p-value |
| <b>Step count</b>     | -7.8                                                      | -14.2 to<br>-1.3                                 | 0.018   | -3.5                                                  | -9.44 to<br>2.35                                   | 0.239   |
| <b>Hours outdoors</b> | $-2.5 \times 10^{-3}$                                     | $-6.5 \times 10^{-3}$ to<br>$1.4 \times 10^{-3}$ | 0.217   | $-7.2 \times 10^{-3}$                                 | $-11.6 \times 10^{-3}$ to<br>$-2.9 \times 10^{-3}$ | 0.001   |
| <b>CAT score</b>      | 0.005                                                     | -0.02 to<br>0.03                                 | 0.749   | 0.02                                                  | -0.015 to<br>0.053                                 | 0.267   |
| <b>PEFR</b>           | -0.09                                                     | -0.18 to<br>0.002                                | 0.056   | -0.11                                                 | -0.23 to<br>-0.005                                 | 0.040   |
| <b>Dyspnoea</b>       | $0.3 \times 10^{-3}$                                      | $-8.0 \times 10^{-3}$ to<br>$8.7 \times 10^{-3}$ | 0.941   | $7.1 \times 10^{-3}$                                  | $-1.3 \times 10^{-3}$ to<br>$13.0 \times 10^{-3}$  | 0.017   |

Table S2. Relationship between pollutants ( $PM_{10}$  and  $O_3$ ) and Daily steps count, hours spent outdoors, health status (CAT score), PEFR, dyspnoea, **over the weekend only (Saturday and Sunday)**; with allowance for season, linear trend, day-length, temperature, sunshine, rain and wind.

|                       | Effect of $1 \mu\text{g}/\text{m}^3$ $PM_{10}$ (Weekend ) |                                                    |         | Effect of $1 \mu\text{g}/\text{m}^3$ $O_3$ (Weekend) |                                                    |         |
|-----------------------|-----------------------------------------------------------|----------------------------------------------------|---------|------------------------------------------------------|----------------------------------------------------|---------|
|                       | Regression Coefficient                                    | 95% CI                                             | p-value | Regression Coefficient                               | 95% CI                                             | p-value |
| <b>Step count</b>     | -2.58                                                     | -15.97 to<br>10.8                                  | 0.705   | -10.7                                                | -20.4 to<br>-0.89                                  | 0.032   |
| <b>Hours outdoors</b> | $-2.6 \times 10^{-3}$                                     | $-10.2 \times 10^{-3}$ to<br>$-5.0 \times 10^{-3}$ | 0.502   | $-13.1 \times 10^{-3}$                               | $-19.7 \times 10^{-3}$ to<br>$-6.5 \times 10^{-3}$ | <0.001  |
| <b>CAT score</b>      | 0.027                                                     | .011 to<br>0.065                                   | 0.157   | -0.006                                               | -0.030 to<br>0.043                                 | 0.717   |
| <b>PEF</b>            | -0.047                                                    | -0.20 to<br>0.11                                   | 0.554   | 0.04                                                 | -0.13 to<br>0.056                                  | 0.441   |
| <b>Dyspnoea</b>       | $3.81 \times 10^{-3}$                                     | $-16.1 \times 10^{-3}$ to<br>$8.45 \times 10^{-3}$ | 0.542   | $-4.27 \times 10^{-3}$                               | $5.32 \times 10^{-3}$ to 1.38<br>$\times 10^{-3}$  | 0.383   |

Figure S1. Daily Step count and Time outside during the week in COPD patients; data are means  $\pm$  standard errors for daily step count; median  $\pm$  inter-quartile range for hours outside; p-values from a post-hoc analysis of variance and wilcoxon rank-sum test respectively.

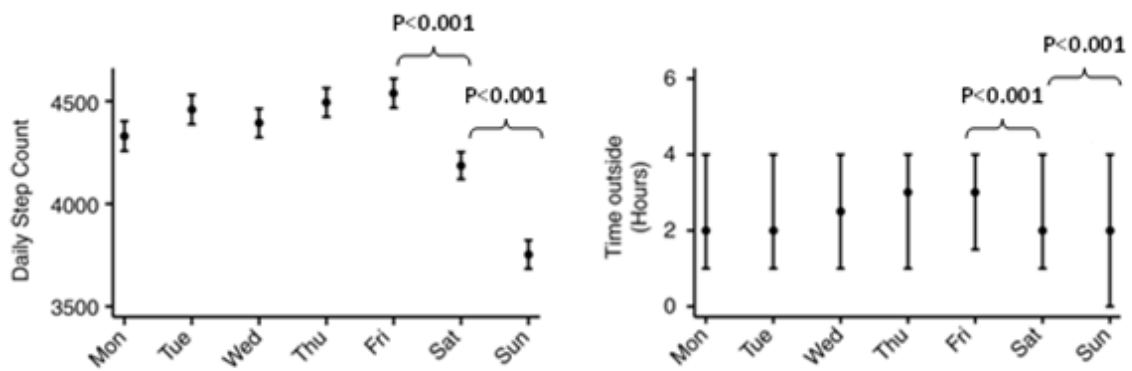

Supplement: 12931_2015_229_MOESM1_ESM.pdf [file 12931_2015_229_MOESM1_ESM.pdf]
